# Supplementary material
Source: MDPI journal article supplement (https://www.mdpi.com/1424-2818/11/9/141)

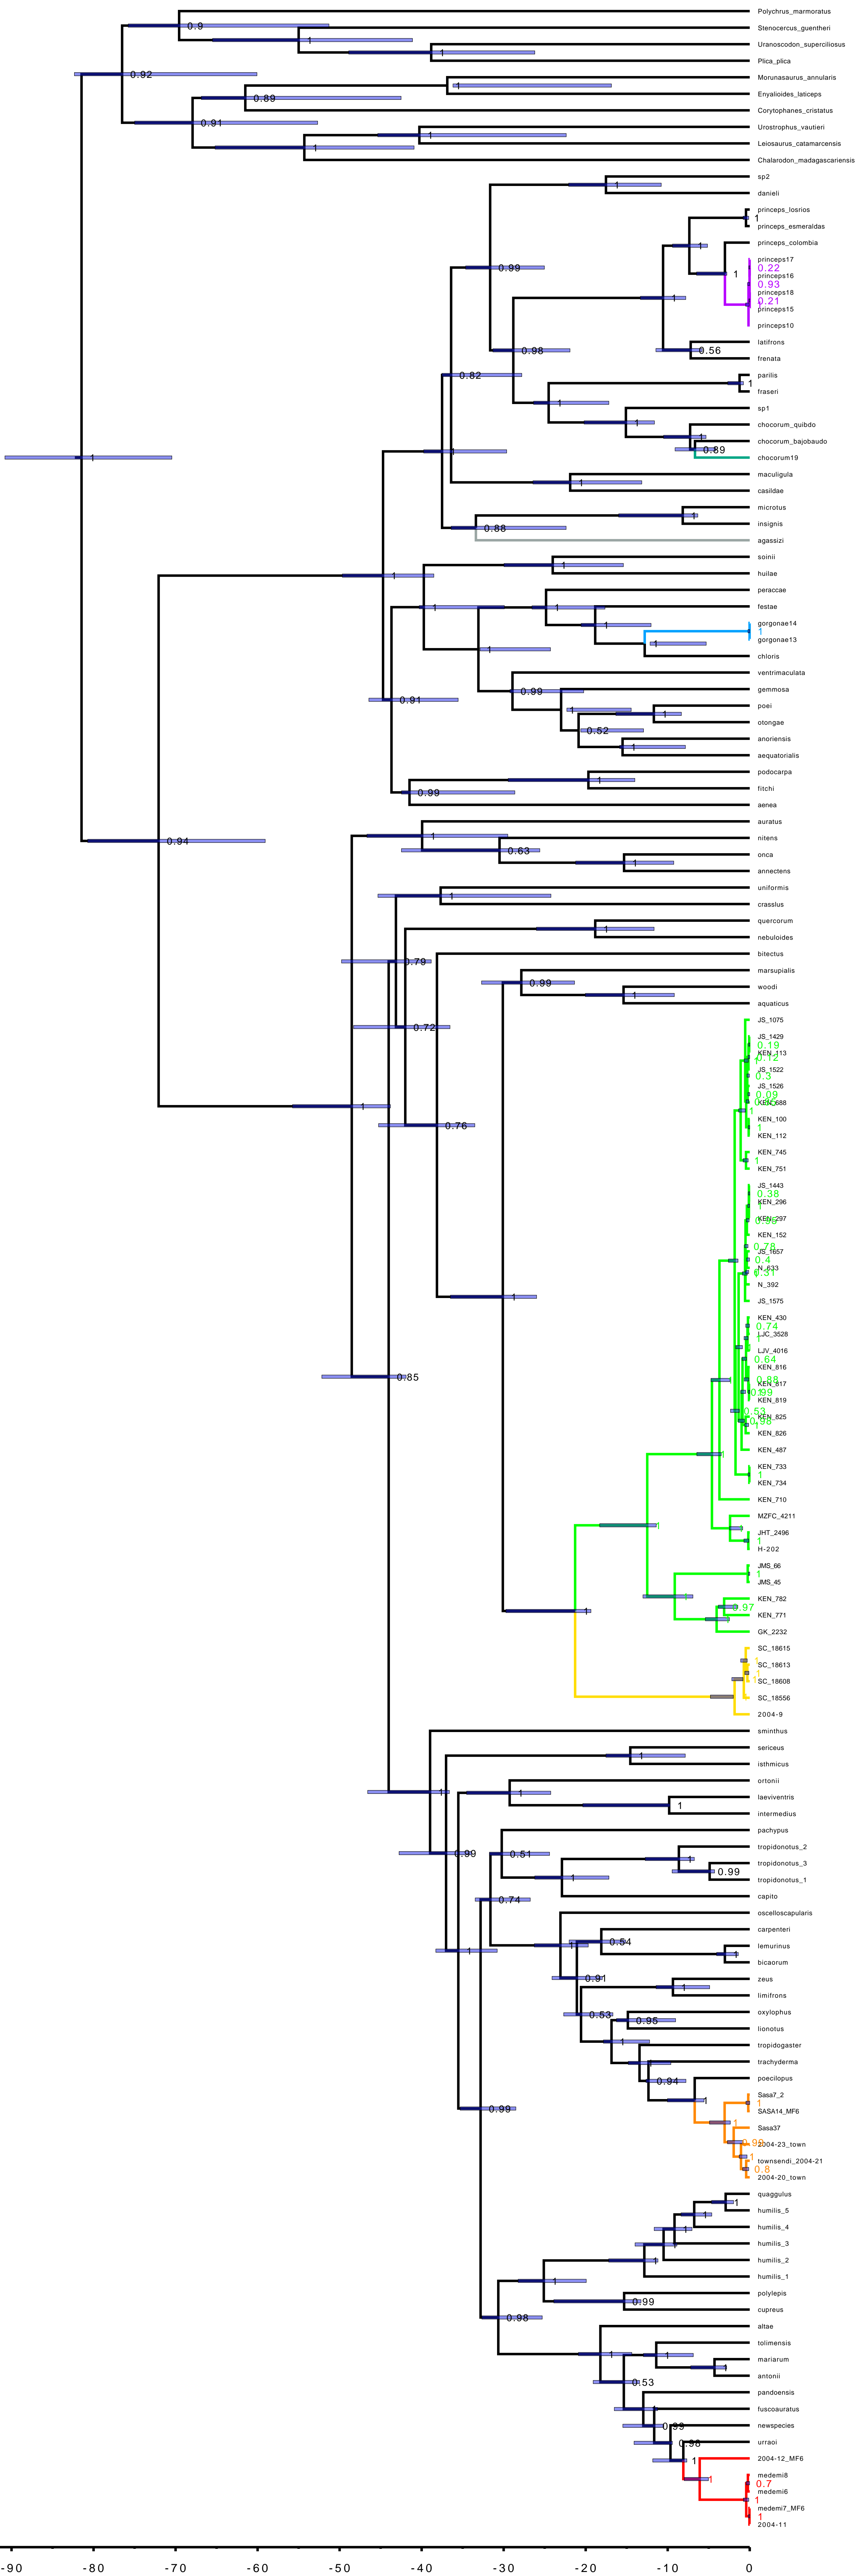

Supplement: s1 [file s1]
